# Supplementary material for: Features of Vat-Photopolymerized Masters for Microfluidic Device Manufacturing
Source: MDPI journal article supplement (doi:10.3390/bioengineering11010080), 2024-01-15
Supplement: s1 [file s1]

**Table S1.** Nominal characteristics of acrylic acid ester employed for the benchmark masters' production [40].

| Property                                       | Unit                 | Result (min ÷ max) |
|------------------------------------------------|----------------------|--------------------|
| Tensile modulus of elasticity                  | [MPa]                | 1700 ÷ 2200        |
| Tensile strength                               | [MPa]                | 45 ÷ 55            |
| Elongation at break                            | [%]                  | 6 ÷ 10             |
| Flexural modulus of elasticity                 | [MPa]                | 2000 ÷ 2500        |
| Viscosity at 25°C (before photopolymerization) | [mPa*s]              | 1000 ÷ 1400        |
| Density (before photopolymerization)           | [g/cm <sup>3</sup> ] | 1.01               |

**Table S2.** Properties of PDMS used to produce replicas of BM4 and BM5 [41].

| Property                     | Unit      | Result               |
|------------------------------|-----------|----------------------|
| One or two part              |           | Two                  |
| Color                        |           | Colorless            |
| Viscosity (base)             | [mPa*s]   | 5100                 |
| Viscosity (mixed)            | [mPa*s]   | 3500                 |
| Thermal conductivity         | [W/m*K]   | 0.27                 |
| Specific gravity (cured)     |           | 1.03                 |
| Pot life at 25 °C            | [h]       | 1.5                  |
| Cure time at 25 °C           | [h]       | 48                   |
| Heat cure time at 100 °C     | [min]     | 35                   |
| Heat cure time at 125 °C     | [min]     | 20                   |
| Heat cure time at 150 °C     | [min]     | 10                   |
| Hardness                     | [shore A] | 43                   |
| Dielectric strength          | [kV/mm]   | 19                   |
| Volume resistivity           | [ohm*cm]  | 2.9*10 <sup>14</sup> |
| Tensile strength             | [MPa]     | 6.7                  |
| Refractive index at 589 nm   |           | 1.4118               |
| Refractive index at 632.8 nm |           | 1.4225               |
| Refractive index at 1321 nm  |           | 1.4028               |
| Refractive index at 1554 nm  |           | 1.3997               |

[40] DWS Brochure - Vitra DL375. <<https://www.dwssystems.com/it/configurator/X/2/vitra-dl375>> Accessed 24.1.11.

[41] Dow - SYLGARD™ 184 Silicone Elastomer Technical Data Sheet. <<https://www.dow.com/content/dam/dcc/documents/en-us/productdatasheet/11/11-31/11-3184-sylgard-184-elastomer.pdf?iframe=true>> Accessed 24.1.11.
